# Supplementary material for: Predictors of Adverse Prognosis in Patients With Acute Coronary Syndrome Caused by Plaque Erosion With a Nonstent Strategy
Source: PubMed Central journal article supplement — J Am Heart Assoc. 2022 Dec 19;11(24):e026414. doi: 10.1161/JAHA.122.026414 (PMC9798785; doi:10.1161/jaha.122.026414), 2022-12-19
Supplement: JAH3-11-e026414-s001.pdf [file JAH3-11-e026414-s001.pdf]

## **SUPPLEMENTAL MATERIAL**

**Table S1. Univariate Cox regression analysis**

| <b>Variables</b>         | <b>p value</b> | <b>HR</b> | <b>95%CI</b> |
|--------------------------|----------------|-----------|--------------|
| Age, years               | 0.007          | 1.038     | 1.010-1.066  |
| Males                    | 0.202          | 0.653     | 0.340-1.256  |
| Current Smoking          | 0.128          | 0.638     | 0.358-1.138  |
| Dyslipidemia             | 0.229          | 0.706     | 0.401-1.244  |
| Hypertension             | 0.510          | 1.225     | 0.669-2.244  |
| Diabetes mellitus        | 0.052          | 2.054     | 0.995-4.241  |
| CKD                      | 0.343          | 1.982     | 0.481-8.162  |
| STEMI                    | 0.175          | 0.618     | 0.308-1.239  |
| Total ischemic time, min | 0.049          | 1.001     | 1.000-1.002  |
| Laboratory data          |                |           |              |
| TG, mg/dL                | 0.932          | 1.000     | 0.997-1.003  |
| TC, mg/dL                | 0.936          | 1.000     | 0.993-1.007  |
| LDL-C, mg/dL             | 0.896          | 0.999     | 0.991-1.008  |
| HDL-C, mg/dL             | 0.982          | 1.000     | 0.979-1.020  |
| Hs-CRP                   | 0.184          | 0.960     | 0.904-1.020  |
| HbA1C                    | 0.309          | 0.831     | 0.581-1.187  |
| CK-MB, $\mu$ g/L         | 0.689          | 1.000     | 0.998-1.001  |
| cTnI, $\mu$ g/L          | 0.913          | 1.000     | 0.998-1.002  |
| NT-pro BNP, pg/mL        | 0.908          | 1.000     | 1.000-1.000  |
| Medications              |                |           |              |
| Aspirin                  | -              | -         | -            |
| Clopidogrel              | 0.669          | 0.873     | 0.470-1.625  |
| Ticagrelor               | 0.669          | 1.145     | 0.615-2.130  |
| Statins                  | -              | -         | -            |
| ACEI/ARB                 | 0.726          | 1.108     | 0.626-1.961  |
| $\beta$ -block           | 0.386          | 1.333     | 0.696-2.553  |

|                             |       |       |              |
|-----------------------------|-------|-------|--------------|
| Lesion location             |       |       |              |
| LAD                         | 0.772 | 0.914 | 0.499-1.675  |
| LCX                         | 0.912 | 1.060 | 0.381-2.948  |
| RCA                         | 0.803 | 1.089 | 0.557-2.129  |
| RVD, mm                     | 0.516 | 0.859 | 0.543-1.359  |
| MLD, mm                     | 0.188 | 0.616 | 0.299-1.268  |
| DS, %                       | 0.344 | 1.014 | 0.986-1.042  |
| Lesion length, mm           | 0.326 | 0.975 | 0.926-1.026  |
| Manual thrombectomy         | 0.208 | 1.561 | 0.780-3.124  |
| GPI                         | 0.388 | 0.782 | 0.448-1.367  |
| Initial TIMI flow grade 0-1 | 0.815 | 0.927 | 0.491-1.749  |
| Underlying Plaque           |       |       |              |
| Fibrous plaque              | 0.011 | 0.216 | 0.067-0.700  |
| Lipid plaque                | 0.011 | 4.634 | 1.430-15.024 |
| FCT                         | 0.573 | 0.998 | 0.992-1.005  |
| Mean lipid arc, °           | 0.374 | 1.003 | 0.997-1.009  |
| Lipid length, mm            | 0.359 | 0.978 | 0.932-1.026  |
| Lipid index                 | 0.551 | 1.000 | 1.000-1.001  |
| Max lipid arc, °            | 0.575 | 1.001 | 0.997-1.006  |
| TCFA                        | 0.040 | 1.891 | 1.029-3.473  |
| Macrophage                  | 0.209 | 1.685 | 0.747-3.801  |
| Microchannel                | 0.708 | 0.897 | 0.509-1.581  |
| Cholesterol crystals        | 0.222 | 0.624 | 0.293-1.330  |
| Calcification               | 0.974 | 0.990 | 0.526-1.862  |
| Layered plaque              | 0.317 | 1.378 | 0.735-2.581  |
| Thrombus type               |       |       |              |
| Red                         | 0.552 | 0.784 | 0.352-1.747  |
| White                       | 0.997 | 1.001 | 0.570-1.760  |
| Mixed                       | 0.607 | 1.176 | 0.634-2.181  |

|                                  |       |       |             |
|----------------------------------|-------|-------|-------------|
| Thrombus length, mm              | 0.715 | 0.990 | 0.935-1.047 |
| Thrombus area, mm <sup>2</sup>   | 0.561 | 1.093 | 0.810-1.474 |
| Thrombus volume, mm <sup>3</sup> | 0.848 | 1.002 | 0.985-1.018 |
| Thrombus burden                  | 0.008 | 1.031 | 1.008-1.055 |
| Thrombus score                   | 0.717 | 0.999 | 0.995-1.004 |
| MLA                              | 0.042 | 0.771 | 0.600-0.991 |
| AS%                              | 0.003 | 1.041 | 1.014-1.070 |

---

ACEI, angiotensin-converting enzyme inhibitor; ARB, angiotensin II receptor blocker; AS%, percentage of area stenosis; CKD, chronic kidney disease; CK-MB, creatine kinase myocardial band; CTnI, troponin I; DS, diameter stenosis; FCT, fibrous cap thickness; GPI, glycoprotein IIb/IIIa inhibitor; HbA1c, glycated hemoglobin; HDL-C, high-density lipoprotein cholesterol; Hs-CRP, high-sensitive C-reactive protein; LAD, left anterior descending artery; LCX, left circumflex artery; LDL-C, low-density lipoprotein cholesterol; LVEF, left ventricular ejection fraction; MACE, major adverse cardiovascular event; MLA, minimal lumen area; MLD, minimal lumen diameter; NSTEMI-ACS, non-ST-segment elevation acute coronary syndrome; NT-pro BNP, N-terminal pro-B type natriuretic peptide; RCA, right coronary artery; RVD, reference vessel diameter; STEMI, ST-segment elevation myocardial infarction; TC, total cholesterol. TCFA, thin-cap fibroatheroma; TG, triglyceride. TIMI, thrombolysis in myocardial infarction.
